# Supplementary material for: AM1241 alleviates MPTP-induced Parkinson's disease and promotes the regeneration of DA neurons in PD mice
Source: PubMed Central journal article supplement (PMC5620217; doi:10.18632/oncotarget.18871), 2017-06-29
Supplement: oncotarget-08-67837-s001.pdf [file oncotarget-08-67837-s001.pdf]

# AM1241 alleviates MPTP-Induced Parkinson's Disease and promotes the regeneration of DA neurons in PD mice

## SUPPLEMENTARY FIGURES

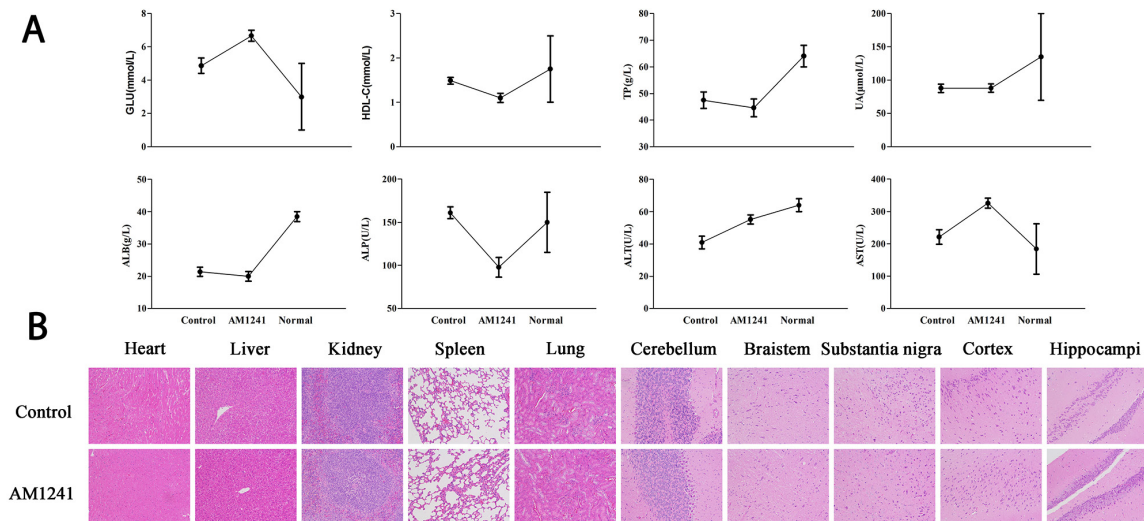

**Supplementary Figure 1: Biocompatibility of AM1241 on normal mice.** Control mice was treated with AM1241 (12 mg/kg, the maximum dose in our experiment) for 2 weeks before detections. (A) blood biochemical analysis of mice treated with AM1241 of 12 mg/kg. (B) HE staining of mice organs treated with AM1241, which revealed that AM1241 did not show significant toxicity on each organs.

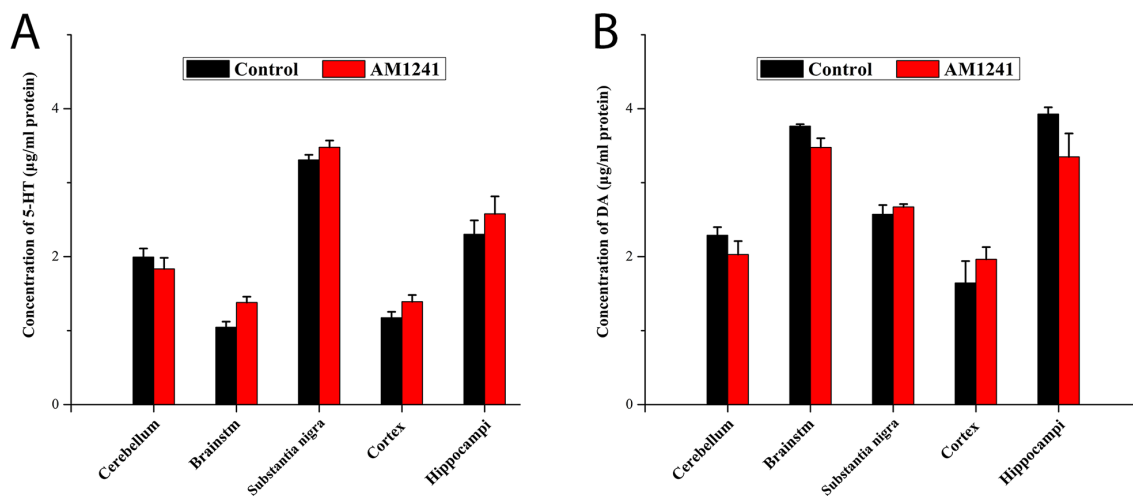

**Supplementary Figure 2: The detections of concentrations of DA and 5-HT in different regions of mice brain that treated only with AM1241 of 12 mg/kg.** The results confirmed that AM1241 did not affect the level of DA and 5-HT on normal mice under the experimental concentration.

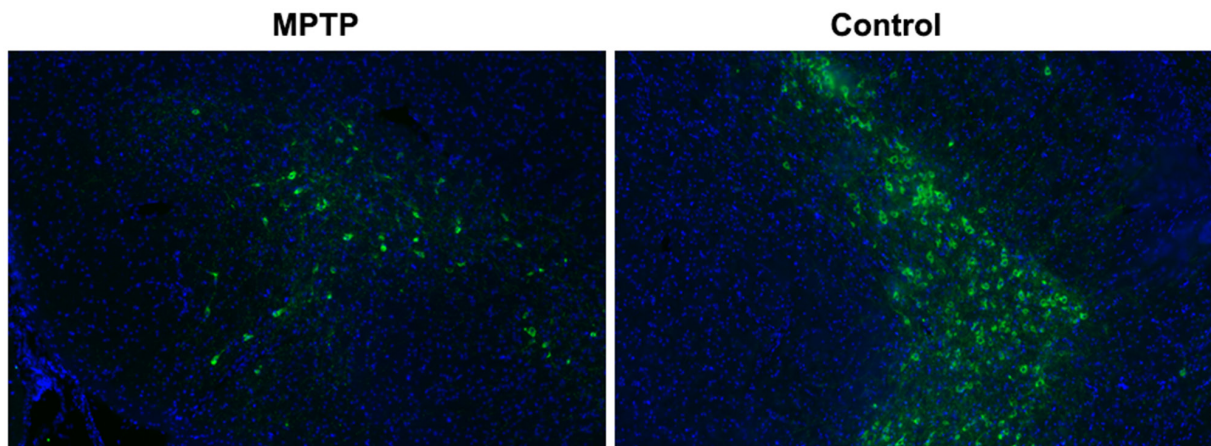

Supplementary Figure 3: The immunofluorescence antibody assay of TH positive cells in the striatum of control mice and MPTP model.
